# Supplementary material
Source: publisher site journal article supplement (https://kjim.org/upload/media/kjim-2023-358-Supplementary-Table-2.pdf)
Supplement: Supplementary file 1 [file kjim-2023-358-Supplementary-Table-2.pdf]

**Supplementary Table 2. Substantial interval changes according to origin of layer**

|                     | MM | SM | MP | <i>p</i> value | p1    | p2    | p3    |
|---------------------|----|----|----|----------------|-------|-------|-------|
| No.                 | 10 | 42 | 18 |                |       |       |       |
| Substantial changes | 0  | 5  | 4  | 0.232          | 0.582 | 0.528 | 0.295 |

MM, muscularis muscosae; SM, submucosa; MP, muscularis propria; p1, MM vs. SM; p2, SM vs. MP; p3, MM vs. MP.
